# Supplementary material for: Attaining Toughness and Reduced Electrical Percolation Thresholds in Bio-Based PA410 by Combined Addition of Bio-Based Thermoplastic Elastomers and CNTs
Source: MDPI journal article supplement (doi:10.3390/polym13193420), 2021-10-05
Supplement: s1 [file s1]

## Supplementary information

Table S1. Mechanical properties of PA410/Pebax1, PA410/Pebax2 and PA410/Pebax3 blends.

|              | Composition | Young's modulus (MPa) | Yield strength (MPa) | Strain at break (%) | Impact strength (J/m) |
|--------------|-------------|-----------------------|----------------------|---------------------|-----------------------|
| PA410        | 100/0       | 2780±20               | 73.4±0.3             | 133±50              | 31±2                  |
| PA410/Pebax1 | 90/10       | 2350±20               | 63.2±0.5             | 36±36               | 62±2                  |
|              | 80/20       | 2050±30               | 53.4±1.1             | 110±61              | 113±2                 |
|              | 70/30       | 1840±20               | 46.0±0.9             | 121±17              | 162±5                 |
| PA410/Pebax2 | 90/10       | 2300±30               | 61.9±0.5             | 76±43               | 60±4                  |
|              | 80/20       | 2090±20               | 56.2±0.3             | 133±47              | 130±6                 |
|              | 70/30       | 1830±30               | 49.8±0.8             | 161±12              | 162±6                 |
| PA410/Pebax3 | 90/10       | 2430±70               | 63.0±0.9             | 122±64              | 39±3                  |
|              | 80/20       | 2120±90               | 61.8±0.9             | 103±53              | 60±1                  |

Table S2. Calorimetric parameters of PA410, Pebax2 and PA410/Pebax2 blends obtained from the DSC curves.  $T_m^1$  and  $\Delta H_m^1$ , melting temperature and enthalpy, respectively, from the first heating scan.  $\chi_c$ , crystallinity degree considering  $\Delta H_f^\infty = 269$  J/g<sup>42</sup>.  $T_c$  and  $\Delta H_c$ , crystallization temperature and enthalpy, respectively, from the cooling scan. Values in brackets are normalized with respect to the weight fraction of PA410 in the blends.

| PA410/Pebax2 composition | $T_m^1$ (°C) | $\Delta H_m^1$ (J/g) | $\chi_c$ (%) | $T_c$ (°C) | $\Delta H_c$ (J/g) |
|--------------------------|--------------|----------------------|--------------|------------|--------------------|
| 100/0                    | 256.4        | 55                   | 20           | 225.3      | -38                |
| 95/5                     | 252.4        | 59(62)               | 23           | 224.6      | -39(41)            |
| 90/10                    | 254.1        | 56(62)               | 23           | 223.6      | -38(42)            |
| 85/15                    | 253.7        | 49(58)               | 22           | 223.9      | -35(41)            |
| 80/20                    | 254.4        | 45(56)               | 21           | 223.6      | -33(42)            |
| 75/25                    | 252.4        | 46(61)               | 23           | 223.3      | -32(43)            |
| 70/30                    | 253.7        | 44(62)               | 23           | 222.9      | -29(41)            |
| 65/35                    | 254.4        | 37(58)               | 21           | 222.9      | -24(37)            |
| 60/40                    | 253.7        | 38(64)               | 24           | 223.3      | -24(41)            |
| 0/100                    | 157.1        | 24                   | ---          | 104.6      | -20                |

Table S3. Mechanical properties of PA410/Pebax2 blends.

| PA410/Pebax2 composition | Young's modulus (MPa) | Yield stress (MPa) | Strain at break (%) | Impact strength (J/m) |
|--------------------------|-----------------------|--------------------|---------------------|-----------------------|
| 100/0                    | 2780±20               | 73.4±0.3           | 133±50              | 31±2                  |
| 95/5                     | 2460±40               | 66.5±0.9           | 33±8                | 43±1                  |
| 90/10                    | 2300±30               | 61.9±0.5           | 76±43               | 60±4                  |
| 85/15                    | 2230±20               | 59.1±0.9           | 124±33              | 100±5                 |
| 80/20                    | 2090±20               | 56.2±0.3           | 133±47              | 130±6                 |
| 75/25                    | 2000±20               | 53.1±0.5           | 137±56              | 143±9                 |
| 70/30                    | 1830±30               | 49.8±0.8           | 161±12              | 162±6                 |
| 65/35                    | 1680±30               | 46.8±0.5           | 62±13               | 122±10                |
| 60/40                    | 1570±20               | 42.6±0.3           | 162±15              | 118±12                |
| 0/100                    | ---                   | 24.9±0.5           | 512±15              | N/B                   |

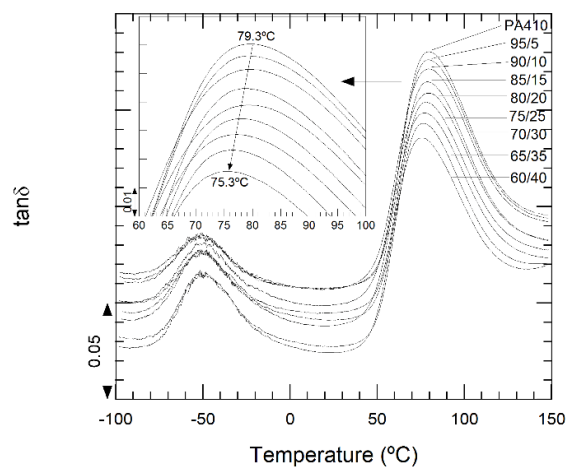

Figure S1. DMTA curves of pure PA410 and PA410/Pebax2 blends. Curves have been shifted in the vertical axis.

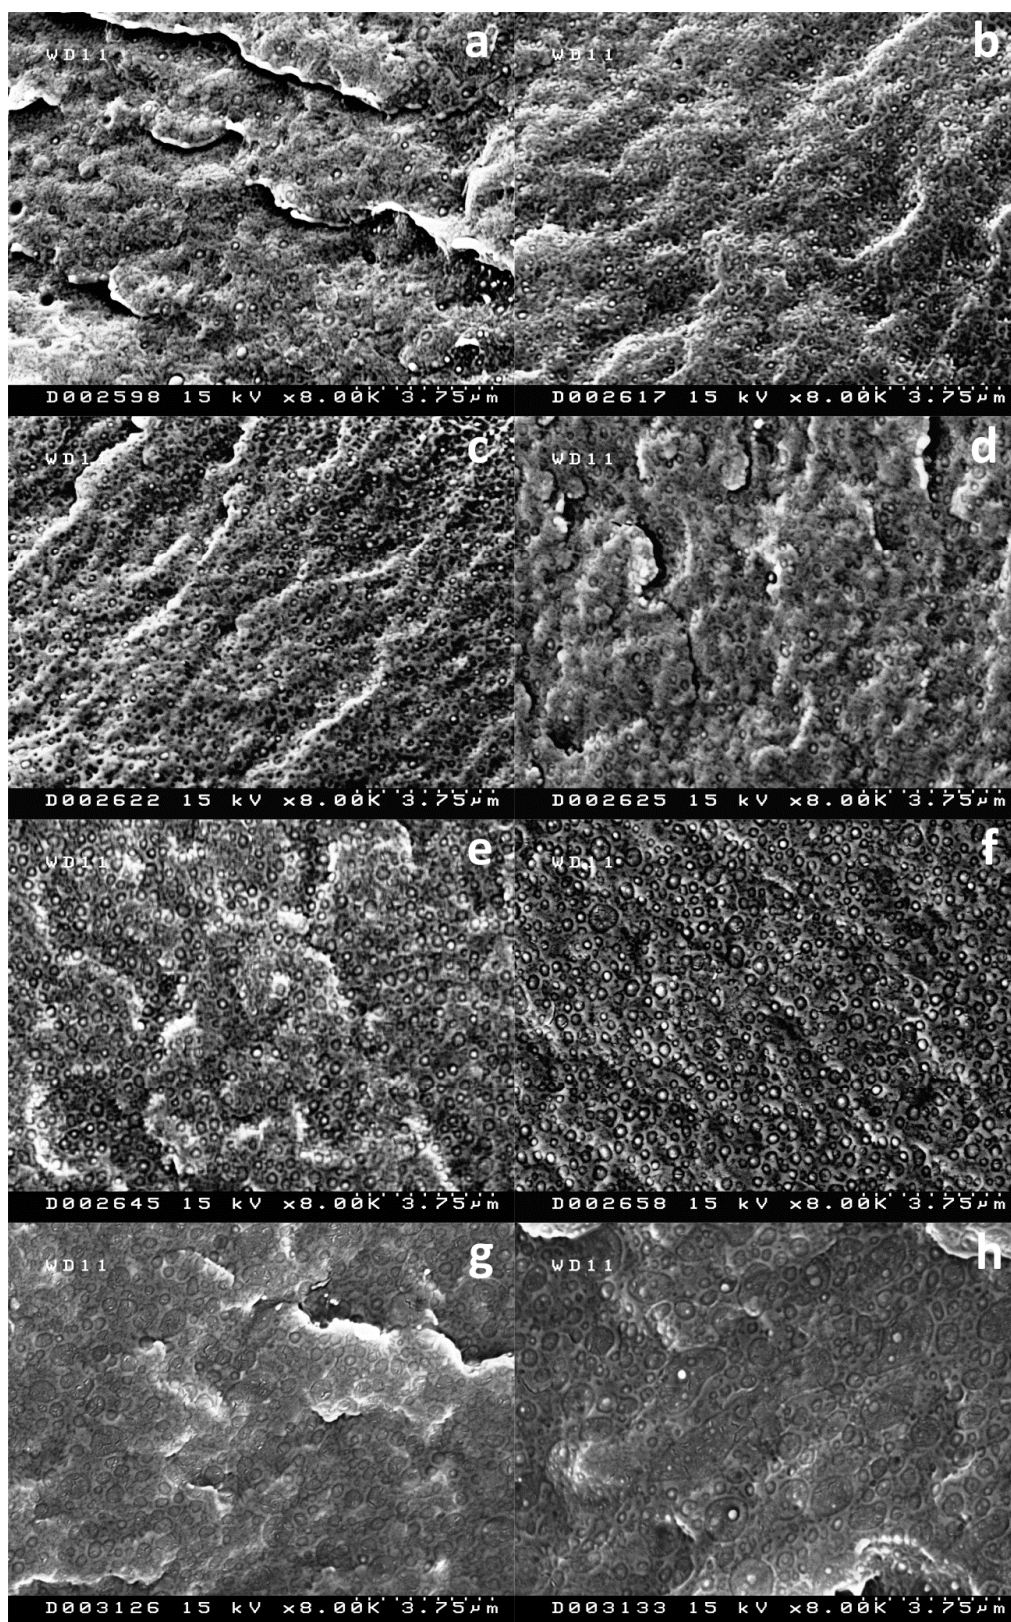

Figure S2. SEM micrographs of cryogenically fractured surfaces of the PA410/Pebax2 blends: (a) 95/5, (b) 90/10, (c) 85/15, (d) 80/20, (e) 75/25, (f) 70/30, (g) 65/35, (h) 60/40.

45. Moran, C. S.; Barthelon, A.; Pearsall, A.; Mittal, V.; Dorgan, J. R. Biorenewable blends of polyamide-4,10 and polyamide-6,10. *J. Appl. Polym. Sci.* 2016, 133, 43626. DOI: <https://doi.org/10.1002/app.43626>
